# Supplementary material for: Origin, exposure routes and xenobiotics impart nanoplastics with toxic effects on freshwater bivalves
Source: Royal Society of Chemistry journal article supplement (doi:10.1039/d3en00022b), 2023-01-01
Supplement: d3en00022b1.pdf [file d3en00022b1.pdf]

## Origin, exposure routes and xenobiotics impart nanoplastics with toxicity on freshwater bivalves

Adeline Arini<sup>1</sup>, Sandra Muller<sup>1</sup>, Véronique Coma<sup>2</sup>, Etienne Grau<sup>2</sup>, Olivier Sandre<sup>2\*</sup>, Magalie Baudrimont<sup>1\*</sup>

<sup>1</sup> Univ. Bordeaux, CNRS, Bordeaux INP, EPOC, UMR 5805, F-33600 Pessac, France

<sup>2</sup> Univ. Bordeaux, CNRS, Bordeaux INP, LCPO, UMR 5629, F-33600 Pessac, France

\*Contact e-mails: [olivier.sandre@u-bordeaux.fr](mailto:olivier.sandre@u-bordeaux.fr) (OS), [magalie.baudrimont@u-bordeaux.fr](mailto:magalie.baudrimont@u-bordeaux.fr) (MB)

### Electronic Supplementary Information

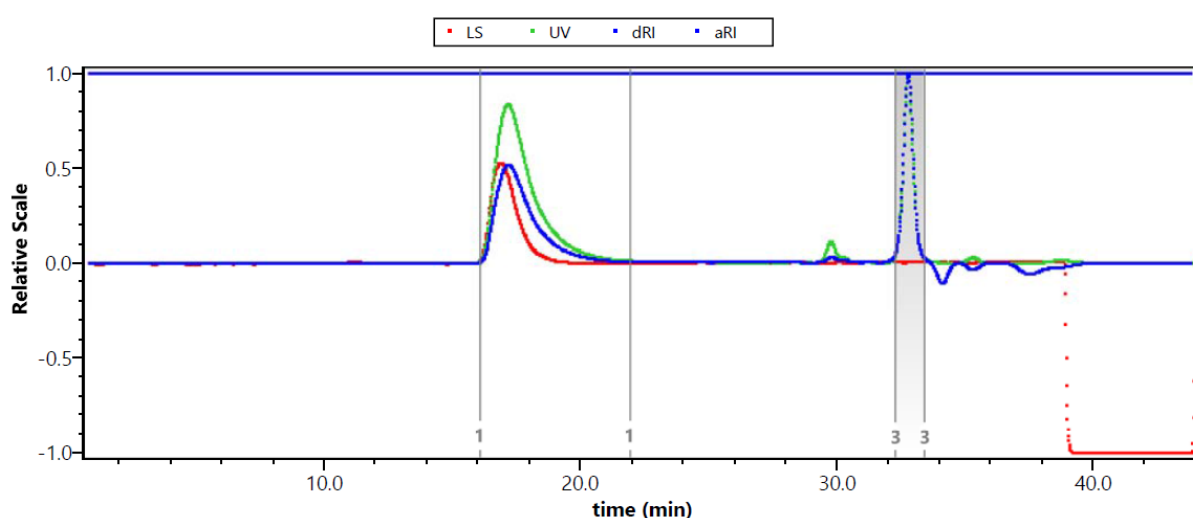

**Figure S1:** Size exclusion chromatogram of the commercial PS chains used to prepare NP-PS model nanoplastics. The peak 1 on the three detectors (light scattering, UV and differential RI) is assigned to the sample yielding to  $M_n=89$  kg/mol,  $M_w=196$  kg/mol and  $\mathcal{D}=M_w/M_n=2.21$ . Peak 3 is the flow marker.

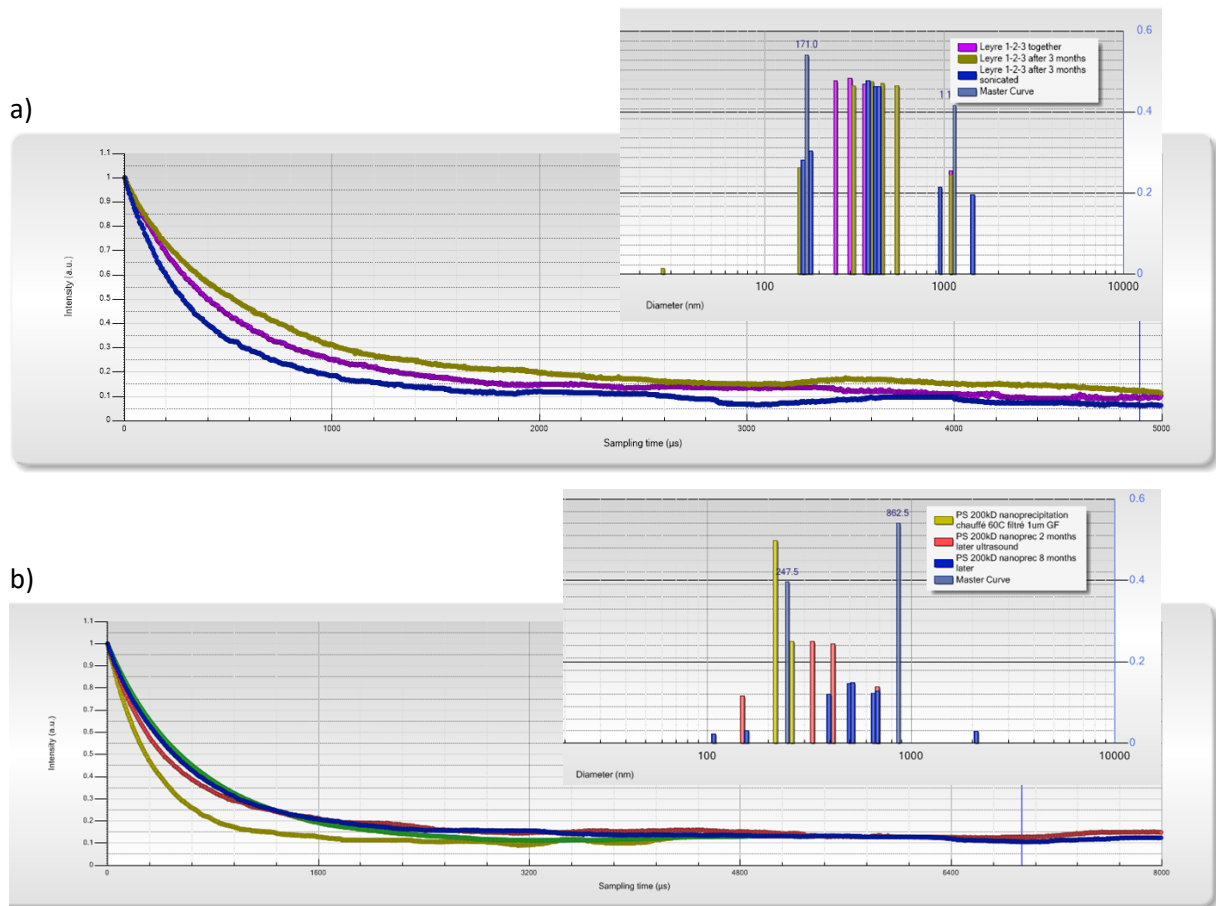

**Figure S2:** Kinetic study of colloidal stability by DLS (at 165° scattering angle, on a Vasco™ Flex remote-head backscattering DLS instrument, Cordouan Technologies, Pessac, France) of a) NP-L and b) NP-PS during several months after their preparation (when indicated, simple sonication with an ultrasound bath for 5 min was performed, before measurement). Insets show hydrodynamic size histograms obtained by the multimode Pade-Laplace fitting method.

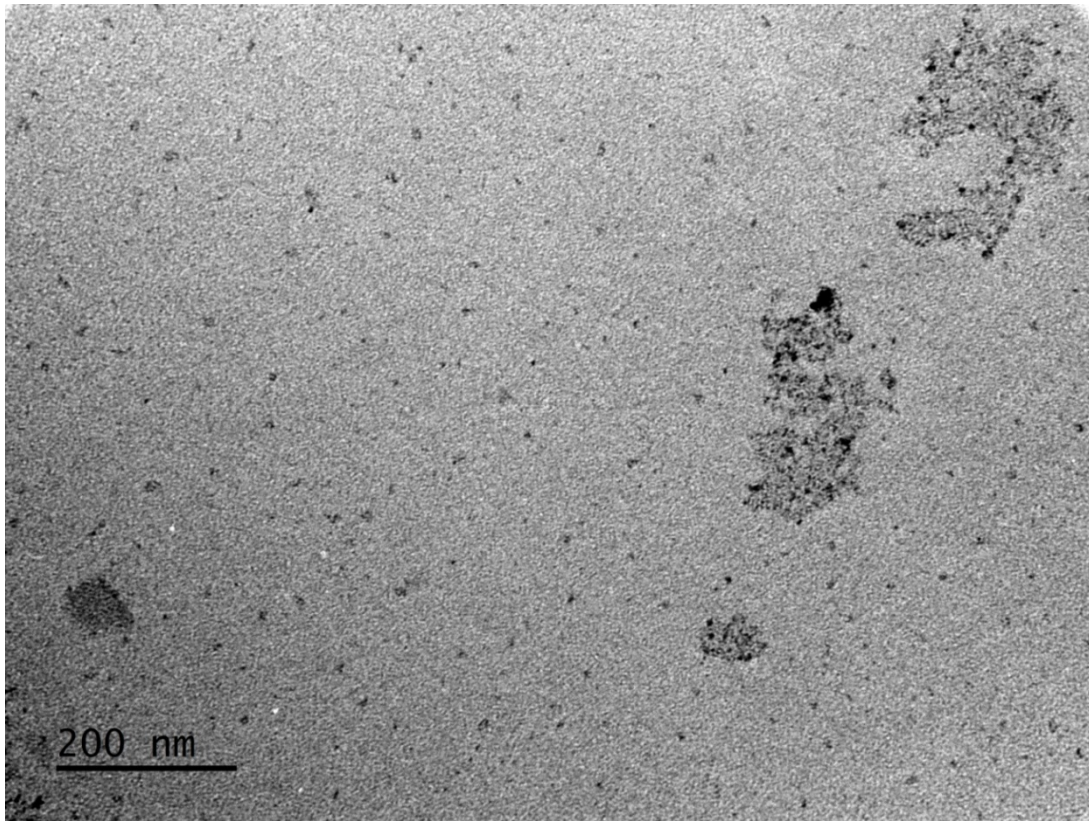

a)

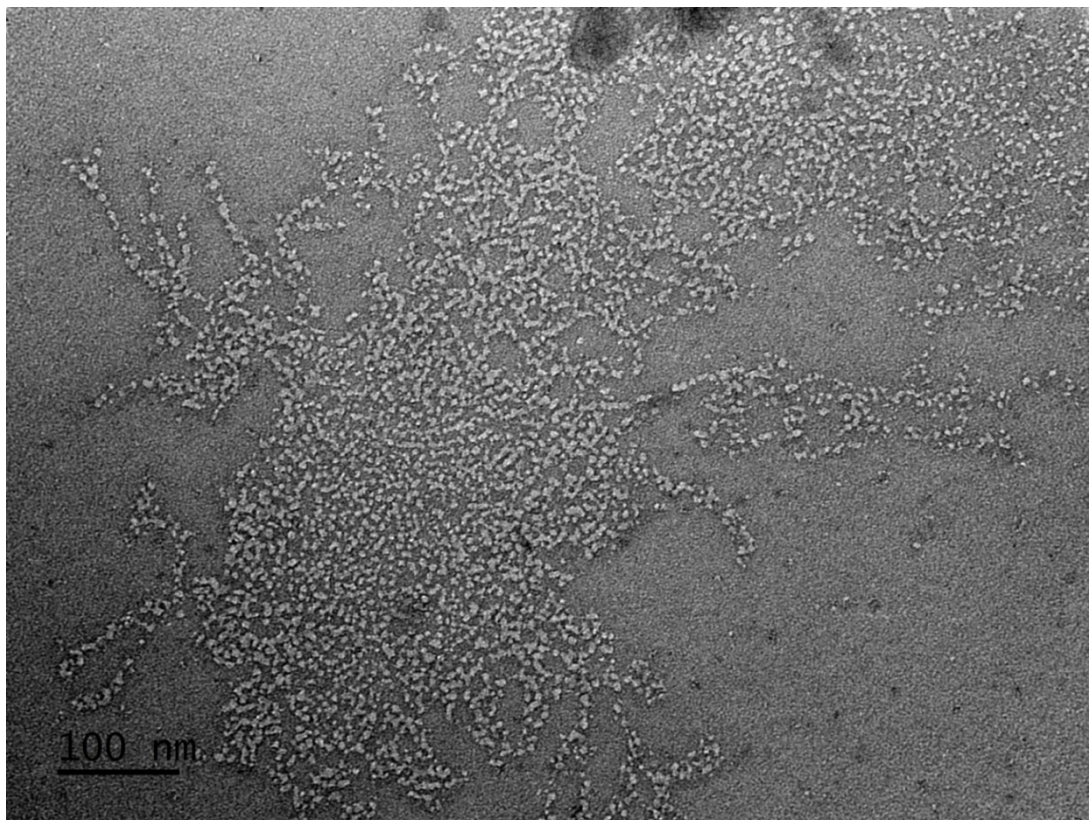

b)

**Figure S3:** TEM image of a) NP-L and b) NP-PS (with samarium acetate staining specifically hydrophilic regions) showing nanoparticles of undefined morphologies in both cases.

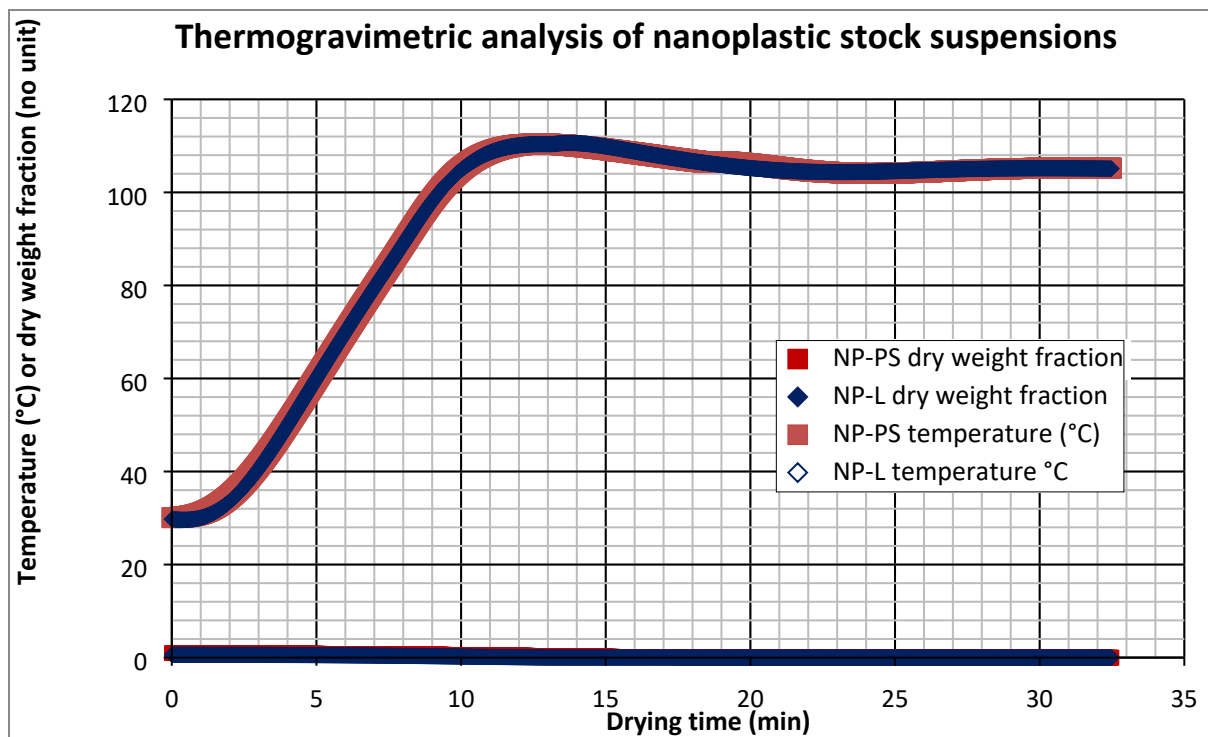

**Figure S4:** Thermogravimetry analyses (TGA) of a) NP-L and b) NP-PS suspensions yielding the weight concentrations of the stock suspensions: 147 mg/L for NP-L and 420 mg/L for NP-PS.
